# Supplementary material
Source: MDPI journal article supplement (https://www.mdpi.com/2073-4441/16/1/175)
Supplement: s1 [file s1]

## Supporting Information for

### Distribution of groundwater hydrochemistry and quality assessment in Hutuo River Drinking Water Source Area of Shijiazhuang (North China Plain)

Ziting Yuan, Yantao Jian, Zhi Chen, Pengfei Jin, Sen Gao, Qi Wang, Zijun Ding, Dandan Wang and Zhiyuan Ma \*

Hebei Key Laboratory of Environment Monitoring and Protection of Geological Resources, Hebei Geo-Environment Monitoring Institute, Shijiazhuang 050022, China; isyuanziting@outlook.com (Z.Y.); jianyantao@126.com (Y.J.); dire2018@163.com (Z.C.); jinfeixssh@163.com (P.J.); gaosen8888@163.com (S.G.); seven18831991984@outlook.com (Q.W.); mr.dingzj@outlook.com (Z.D.); iswangdandan@foxmail.com (D.W.)

\* Correspondence: mzy15031186956@foxmail.com

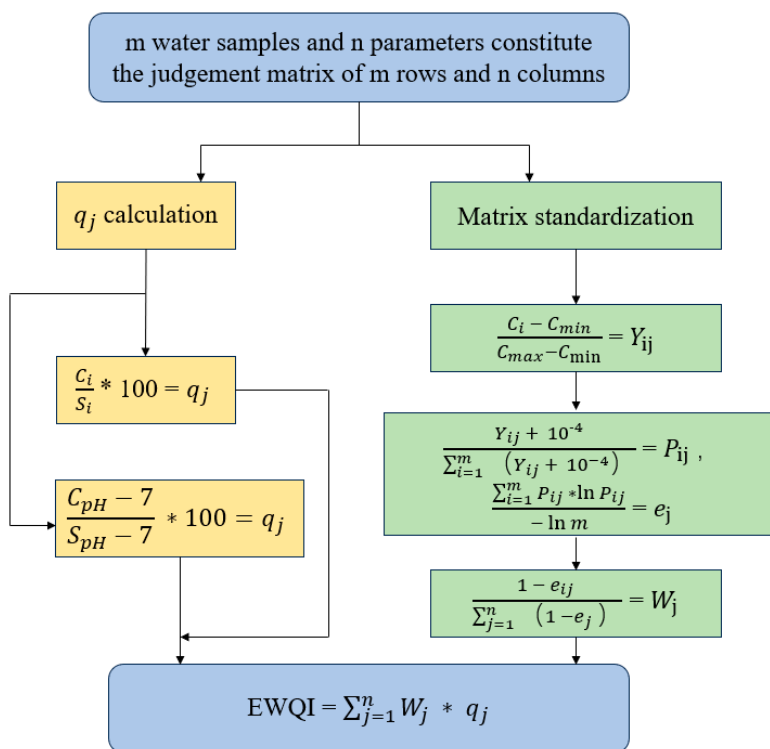

Figure S1. Procedure for calculating EWQI.

Table S1. The entropy weights ( $w_j$ ) and information entropy ( $e_j$ ) values for the qualitative classification.

|       | pH    | TH   | TDS  | Fe <sup>2+</sup> | Na <sup>+</sup> | Al <sup>3+</sup> | Mn <sup>2+</sup> | Zn <sup>2+</sup> | As <sup>3+</sup> | F <sup>-</sup> | SO <sub>4</sub> <sup>2-</sup> | Cl <sup>-</sup> | NO <sub>3</sub> <sup>-</sup> | NO <sub>2</sub> <sup>-</sup> |
|-------|-------|------|------|------------------|-----------------|------------------|------------------|------------------|------------------|----------------|-------------------------------|-----------------|------------------------------|------------------------------|
| $e_j$ | 0.99  | 0.97 | 0.97 | 0.30             | 0.96            | 0.92             | 0.75             | 0.67             | 0.80             | 0.98           | 0.97                          | 0.95            | 0.94                         | 0.37                         |
| $w_j$ | 0.004 | 0.01 | 0.01 | 0.28             | 0.01            | 0.03             | 0.10             | 0.13             | 0.08             | 0.01           | 0.01                          | 0.02            | 0.02                         | 0.26                         |
